# Supplementary material
Source: PubMed Central journal article supplement (PMC3939062)

A

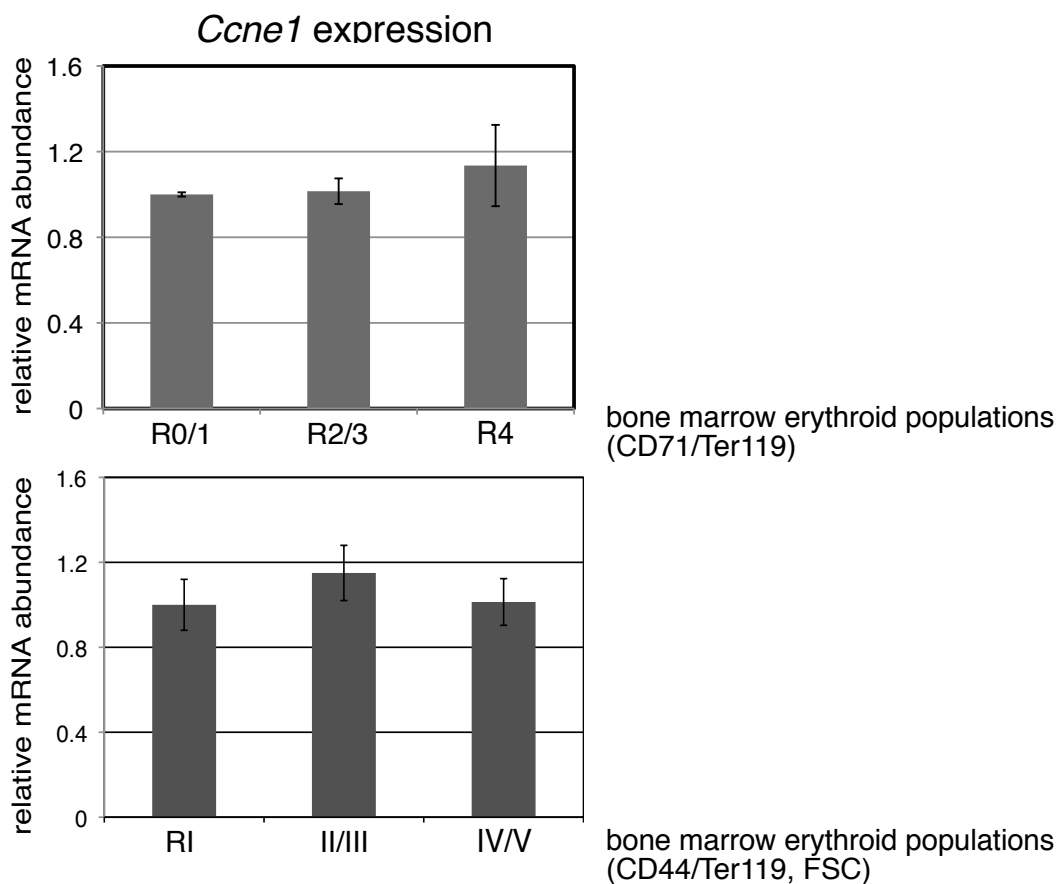

B

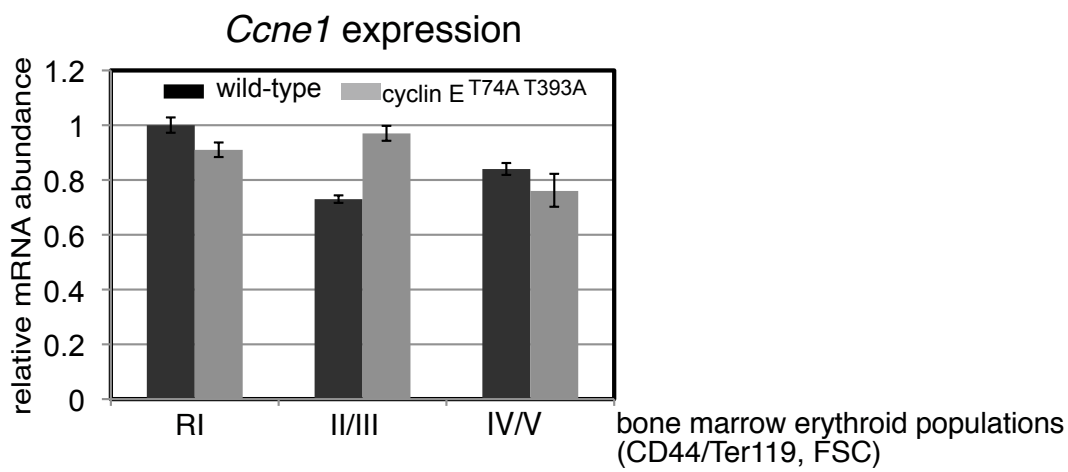

# Supplemental Figure 2

A

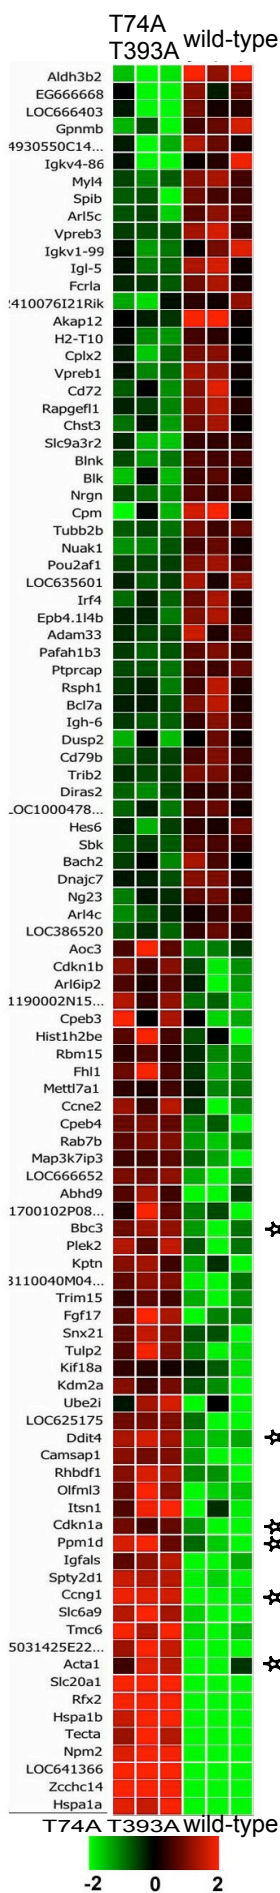

B

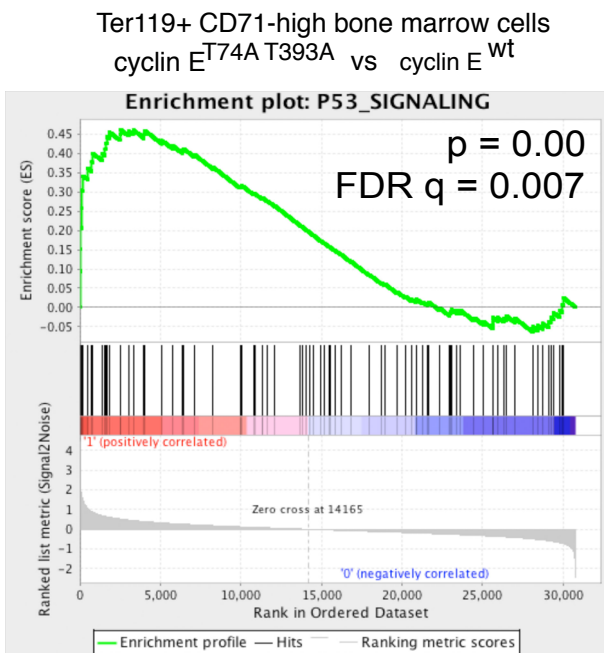

# Supplemental Figure 3

Donor cell  
genotype:

Cyclin E<sup>wild-type</sup> ;  
p53 fl/fl; Mx1-Cre  
- plpC

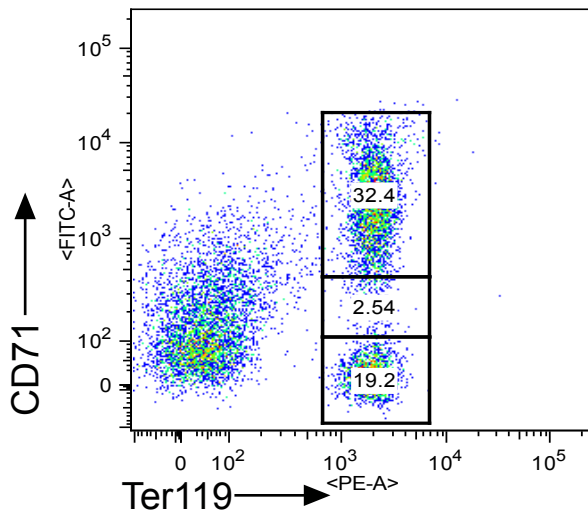

Cyclin E<sup>wild-type</sup> ;  
p53 fl/fl; Mx1-Cre  
+ plpC

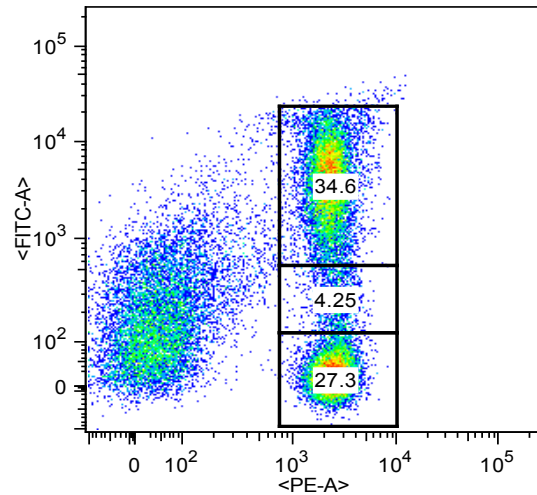

Supplemental Figure 4

Ter119+ population

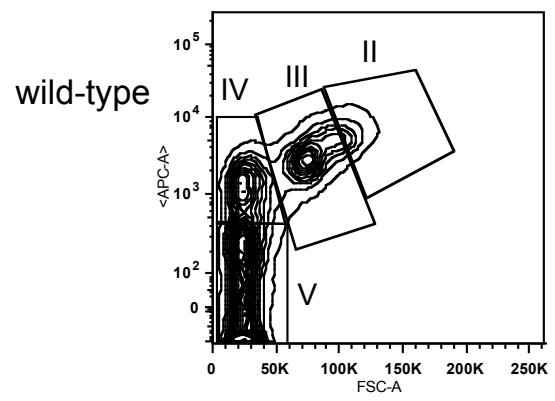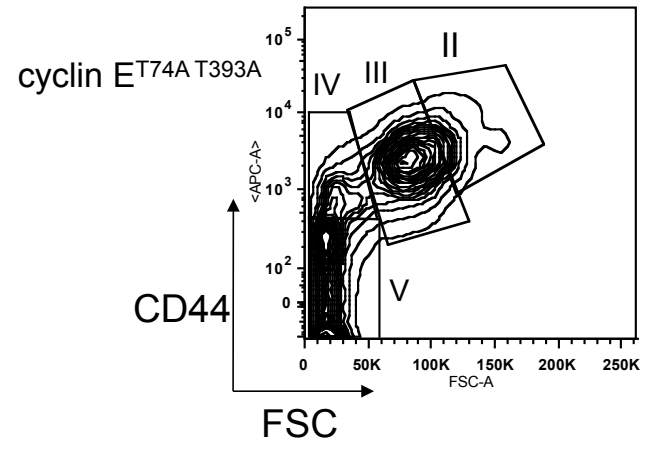

wild-type

cyclin ET<sup>74A</sup> T393A

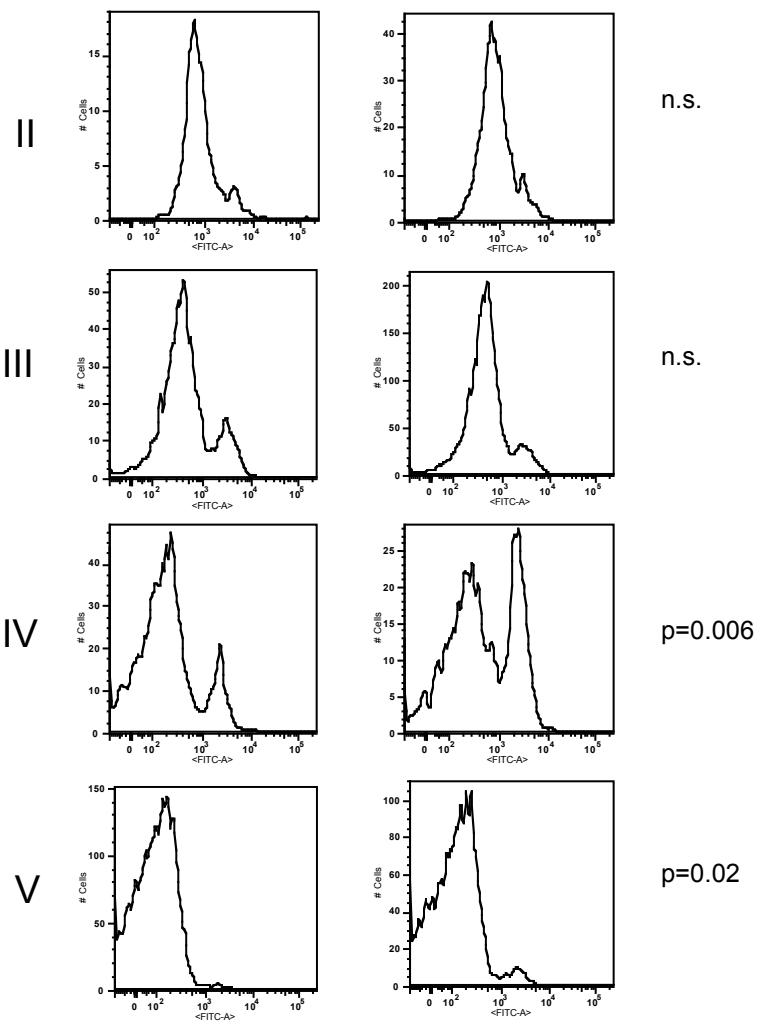

# Supplemental Figure 5

Ter119+ splenocytes

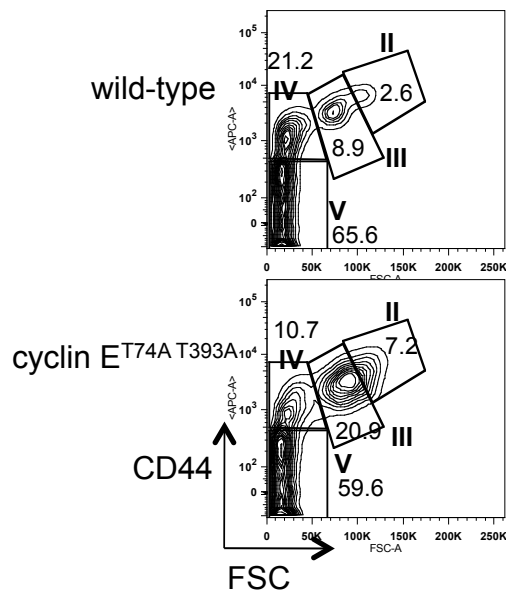

ROS  
Region IV

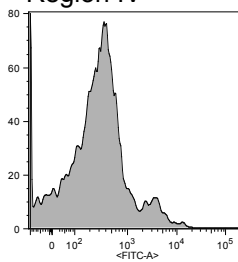

MitoSox  
Region IV

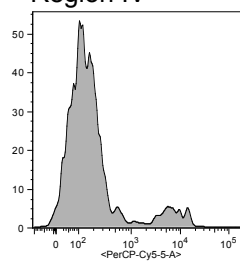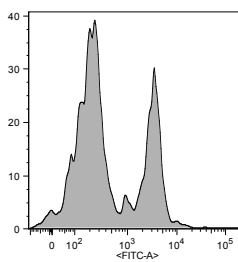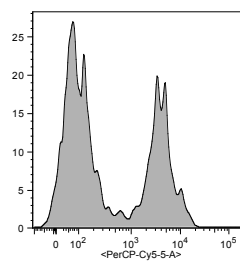

**A**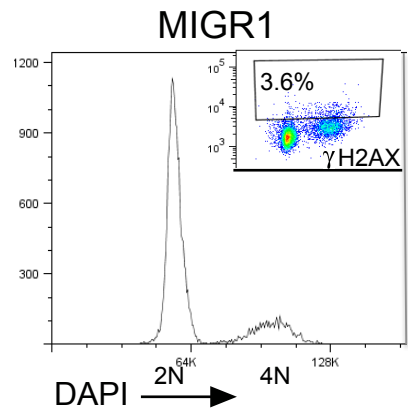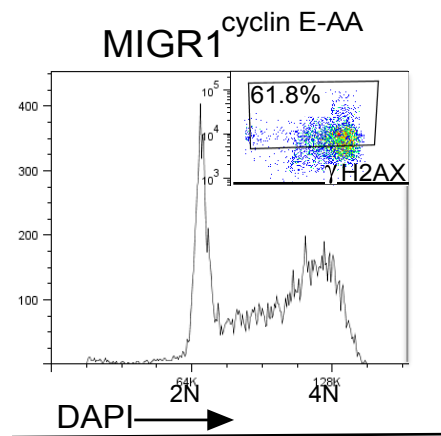

Cell cycle analyses-  
+E2 (48 hours)

**B**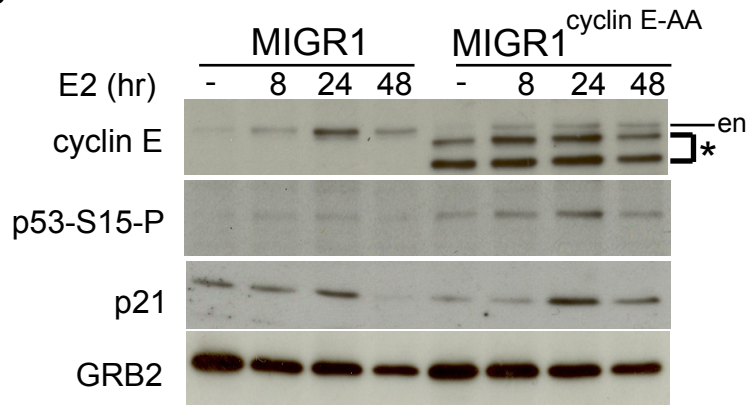**C**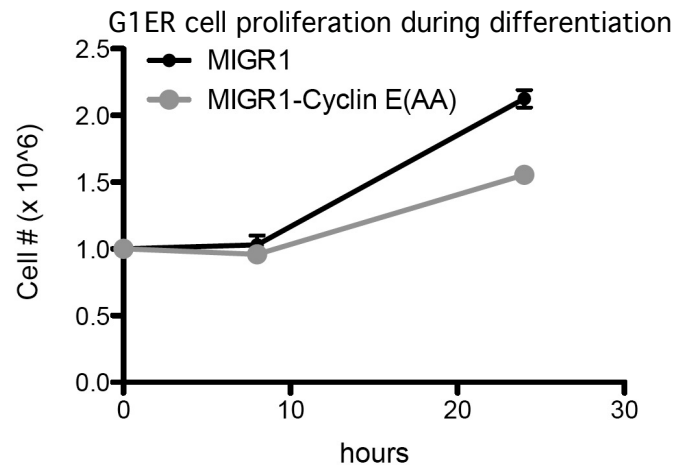

Supplemental Figure 7

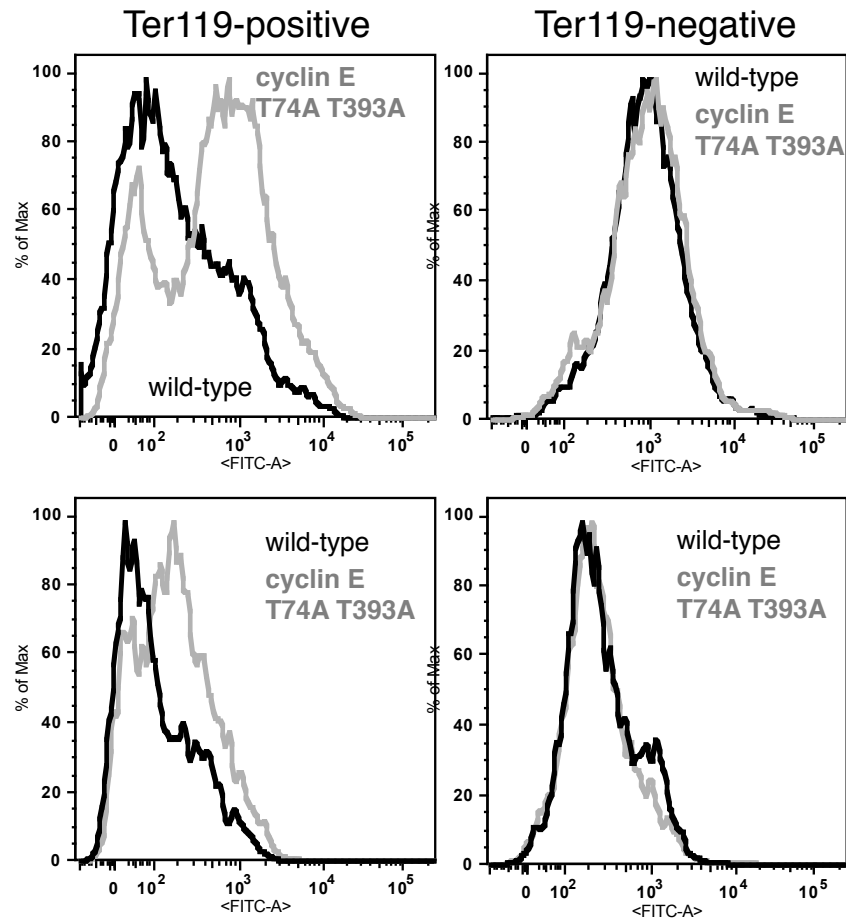

Supplemental Figure 8

A

cyclin E kinase activity  
bone marrow erythroid cells (IV)

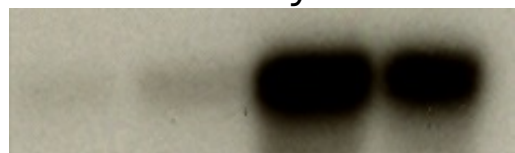

$^{32}$ P-labeled histone H1

1.0    3.9    36.3    33.8    relative kinase activity

B

H3K9 demethylase gene expression  
bone marrow erythroid cells (IV)

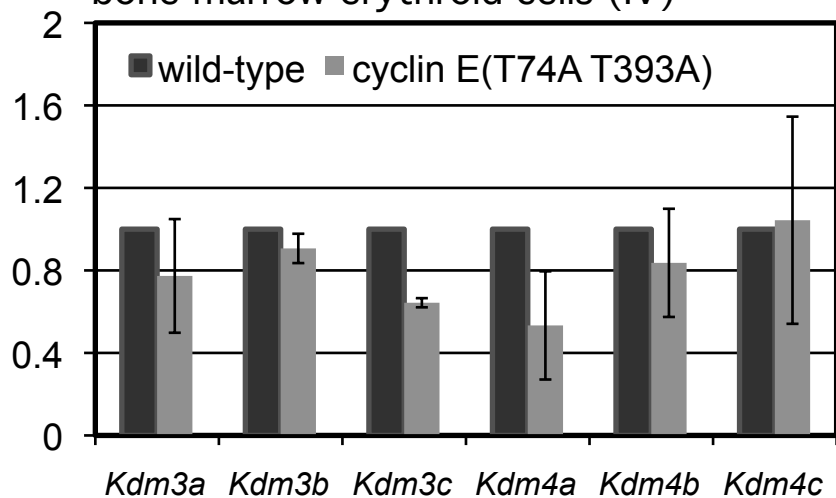

expression induced during  
erythroid differentiation



Supplemental Figure 9

A

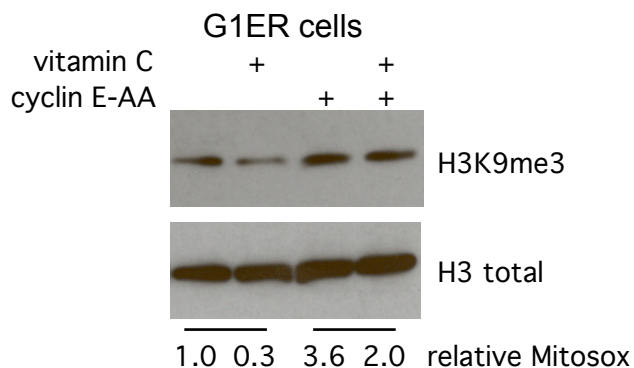

B

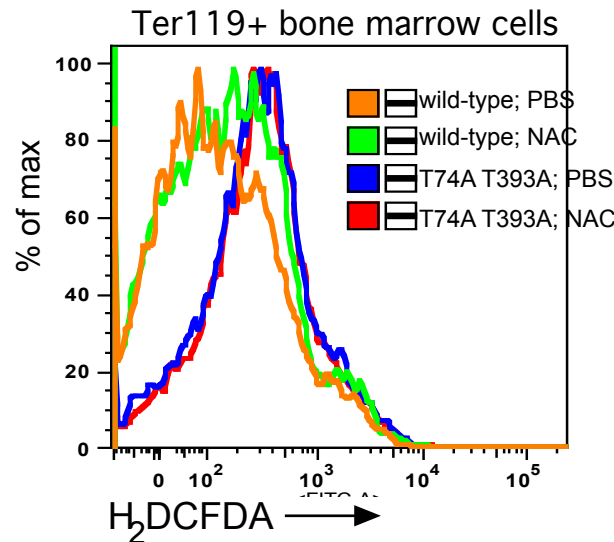

C

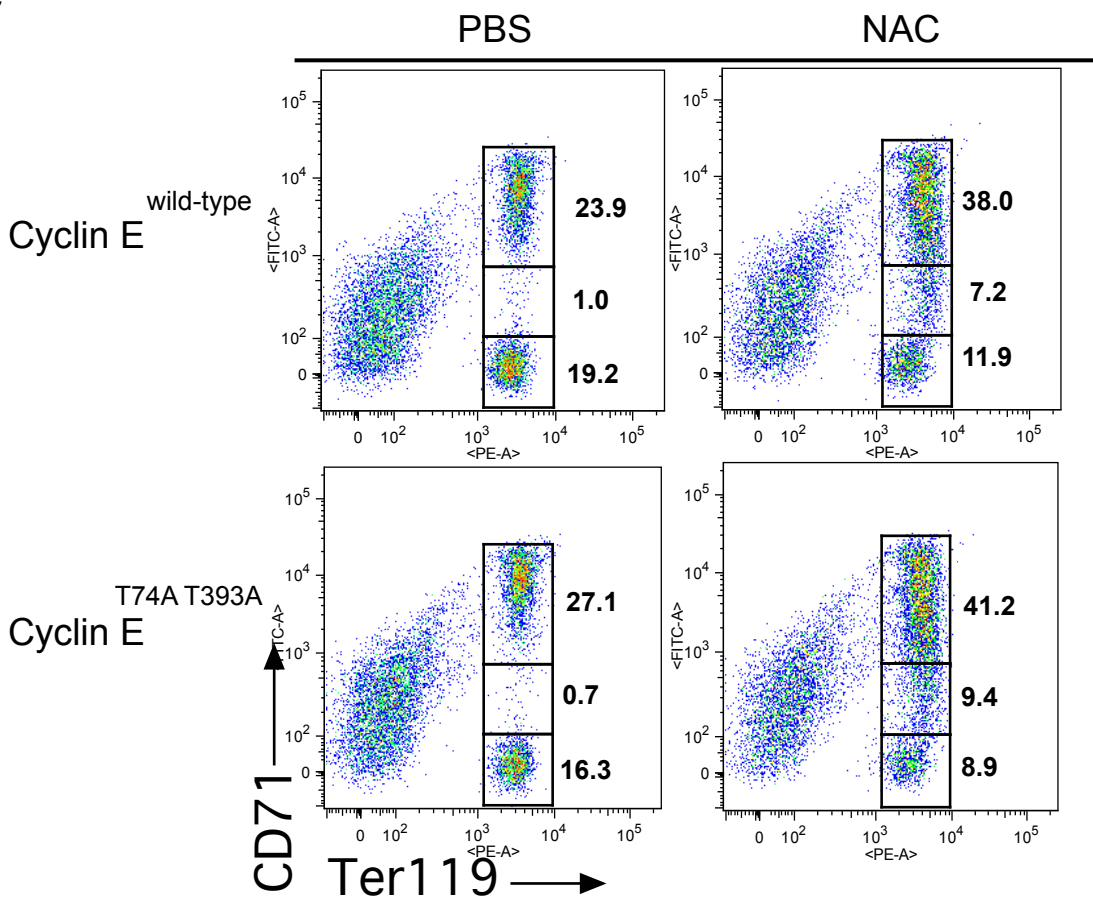

Supplement: NIHMS550212-supplement-2.pdf [file NIHMS550212-supplement-2.pdf]
