# Supplementary material
Source: PubMed Central journal article supplement (PMC3939062)

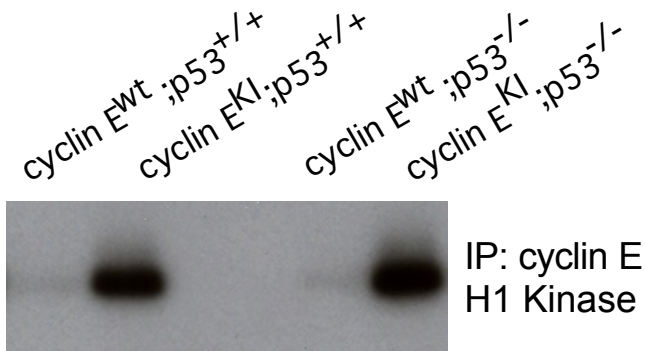

**1.0** **36.8**

**2.1** **43.9**

relative kinase activity

---

TER119+ bone marrow  
erythroid cells

Supplement: NIHMS550212-supplement-3.pdf [file NIHMS550212-supplement-3.pdf]
